# Supplementary material
Source: PubMed Central journal article supplement (PMC3118259)
Supplement: NIHMS278084-supplement-01.pdf [file NIHMS278084-supplement-01.pdf]

**Fig. 4**

Advanced paternal age confers autism susceptibility and also is a risk factor for other neurodevelopmental disorders. To combine *Tsc2* haploinsufficiency with advanced paternal age in mice, we bred old *Tsc2*<sup>+/-</sup> males with WT females and generated controls by crossing young *Tsc2*<sup>+/-</sup> males with WT females and assessed social behavior in the adult offspring. *Tsc2*<sup>+/-</sup> and WT offspring of both young and old fathers showed normal social approach behavior. Plotted is the time (s) test subjects spent exploring either a cage containing a conspecific (social cage) or an empty cage. \*  $P < 0.05$ , \*\*  $P > 0.01$ . Data represent means +/- S.E.M.

**Table 1**

| First trimester (n)                                                      | Second trimester (n) | Third trimester (n) | Outside gestation (n) | $\chi^2$ | P       |
|--------------------------------------------------------------------------|----------------------|---------------------|-----------------------|----------|---------|
| <i>Tuberous sclerosis and ASD</i>                                        |                      |                     |                       |          |         |
| 47                                                                       | 57                   | 75                  | 51                    | 7.983    | 0.0463* |
| <i>Tuberous sclerosis, no ASD or other neurodevelopmental phenotypes</i> |                      |                     |                       |          |         |
| 67                                                                       | 74                   | 58                  | 66                    | 1.943    | 0.5843  |
| <i>ASD, no tuberous sclerosis</i>                                        |                      |                     |                       |          |         |
| 1741                                                                     | 1687                 | 1606                | 1700                  | 5.701    | 0.1271  |

The table shows the number of cases (n) in which peak seasonal flu activity coincided with the first, second or third trimester of gestation or was outside gestational periods. Data are shown for TSC individuals affected by ASD (tuberous sclerosis and ASD), TSC individuals unaffected by ASD or other neurodevelopmental phenotypes (tuberous sclerosis, no ASD or other neurodevelopmental phenotypes) and ASD cases unrelated to tuberous sclerosis (ASD, no tuberous sclerosis), along with results from the corresponding chi square analyses. \*  $P < 0.05$

**Supplementary Table 1**

|                                      | TSC & ASD         | TSC, no ASD, no ID, no IS |
|--------------------------------------|-------------------|---------------------------|
| <b>Year of birth</b> (Mean +/- S.D.) | 1988 +/- 11 years | 1986 +/- 16 years         |
| <b>Gender</b>                        |                   |                           |
| Male                                 | 50.87%            | 42.21%                    |
| Female                               | 49.13%            | 57.79%                    |
| <b>Intellectual disability</b>       |                   |                           |
| Yes                                  | 90.87%            | 0%                        |

|                                    |        |        |
|------------------------------------|--------|--------|
| No                                 | 6.52%  | 100%   |
| Information not available          | 2.61%  | 0%     |
| <b>History of infantile spasms</b> |        |        |
| Yes                                | 38.26% | 0%     |
| No                                 | 11.30% | 100%   |
| Information not available          | 50.43% | 0%     |
| <b>Mutation</b>                    |        |        |
| <i>TSC1</i>                        | 1.74%  | 8.30%  |
| <i>TSC2</i>                        | 18.26% | 19.72% |
| Variant of unknown significance    | 0%     | 1.73%  |
| No mutation identified             | 2.17%  | 6.23%  |
| Data not available                 | 77.83% | 64.01% |

The table shows details regarding the TSC clinical samples used for the current analysis. Information regarding year of birth, gender, clinical features (intellectual disability, history of infantile spasms) and mutational status are presented. TSC & ASD: TSC individuals affected by ASD; TSC, no ASD, no ID, no IS: TSC individuals not affected by ASD, intellectual disability or infantile spasms.
